# Supplementary material for: Hepatic Fat Content and Liver Enzymes Are Associated with Circulating Free and Protein-Bound Advanced Glycation End Products, Which Are Associated with Low-Grade Inflammation: The CODAM Study
Source: Hindawi journal article supplement (doi:10.1155/2019/6289831), 2019-05-14
Supplement: f1 [file 6289831.f1.pdf]

**Suppl. table 1. Associations of FLI with free and protein-bound AGEs and sRAGE**

| <b>FLI</b>                                  |       |         |        |        |                  |
|---------------------------------------------|-------|---------|--------|--------|------------------|
| Outcome                                     | Model | $\beta$ | 95% CI |        | P-value          |
| <b>Free CML</b><br>(nM)                     | 1     | 0.031   | 0.001  | 0.062  | <b>0.043</b>     |
|                                             | 2     | 0.027   | -0.004 | 0.057  | 0.083            |
|                                             | 3     | 0.033   | 0.002  | 0.064  | <b>0.038</b>     |
|                                             | 4     | 0.048   | -0.004 | 0.099  | 0.068            |
| <b>Free CEL</b><br>(nM)                     | 1     | 0.064   | 0.034  | 0.093  | <b>&lt;0.001</b> |
|                                             | 2     | 0.053   | 0.023  | 0.083  | <b>&lt;0.001</b> |
|                                             | 3     | 0.058   | 0.029  | 0.088  | <b>&lt;0.001</b> |
|                                             | 4     | 0.069   | 0.019  | 0.119  | <b>0.007</b>     |
| <b>Free MG-H1</b><br>(nM)                   | 1     | 0.013   | -0.034 | 0.060  | 0.590            |
|                                             | 2     | 0.000   | -0.047 | 0.047  | 0.990            |
|                                             | 3     | -0.001  | -0.048 | 0.047  | 0.976            |
|                                             | 4     | 0.004   | -0.076 | 0.083  | 0.930            |
| <b>PB-Pentosidine</b><br>(nmol/mmol lysine) | 1     | -0.070  | -0.101 | -0.039 | <b>&lt;0.001</b> |
|                                             | 2     | -0.086  | -0.117 | -0.055 | <b>&lt;0.001</b> |
|                                             | 3     | -0.093  | -0.124 | -0.062 | <b>&lt;0.001</b> |
|                                             | 4     | -0.061  | -0.113 | -0.009 | <b>0.022</b>     |
| <b>PB-CML</b><br>(nmol/mmol lysine)         | 1     | -0.089  | -0.110 | -0.067 | <b>&lt;0.001</b> |
|                                             | 2     | -0.096  | -0.117 | -0.074 | <b>&lt;0.001</b> |
|                                             | 3     | -0.081  | -0.103 | -0.058 | <b>&lt;0.001</b> |
|                                             | 4     | -0.063  | -0.100 | -0.025 | <b>0.001</b>     |
| <b>PB-CEL</b><br>(nmol/mmol lysine)         | 1     | 0.026   | -0.002 | 0.053  | 0.067            |
|                                             | 2     | 0.024   | -0.005 | 0.003  | 0.621            |
|                                             | 3     | 0.033   | 0.003  | 0.063  | <b>0.031</b>     |
|                                             | 4     | 0.046   | -0.004 | 0.096  | 0.069            |
| <b>sRAGE</b><br>(pg/ml)                     | 1     | -0.090  | -0.127 | -0.053 | <b>&lt;0.001</b> |
|                                             | 2     | -0.066  | -0.103 | -0.029 | <b>0.001</b>     |
|                                             | 3     | -0.063  | -0.102 | -0.025 | <b>0.001</b>     |
|                                             | 4     | -0.030  | -0.095 | 0.034  | 0.354            |

**Suppl. table 2. Associations of FLI with low-grade inflammation**

| <b>FLI</b>     |              |                           |               |       |                  |
|----------------|--------------|---------------------------|---------------|-------|------------------|
| <b>Outcome</b> | <b>Model</b> | <b><math>\beta</math></b> | <b>95% CI</b> |       | <b>P-value</b>   |
| <b>LGI</b>     | 1            | 0.325                     | 0.242         | 0.408 | <b>&lt;0.001</b> |
|                | 2            | 0.343                     | 0.260         | 0.427 | <b>&lt;0.001</b> |
|                | 3            | 0.329                     | 0.243         | 0.416 | <b>&lt;0.001</b> |
|                | 4            | 0.234                     | 0.090         | 0.378 | <b>0.002</b>     |
